# Supplementary material for: Galectin-1 Modulates the Fusogenic Activity of Placental Endogenous Retroviral Envelopes
Source: MDPI journal article supplement (doi:10.3390/v15122441), 2023-12-16
Supplement: s1 [file s1]

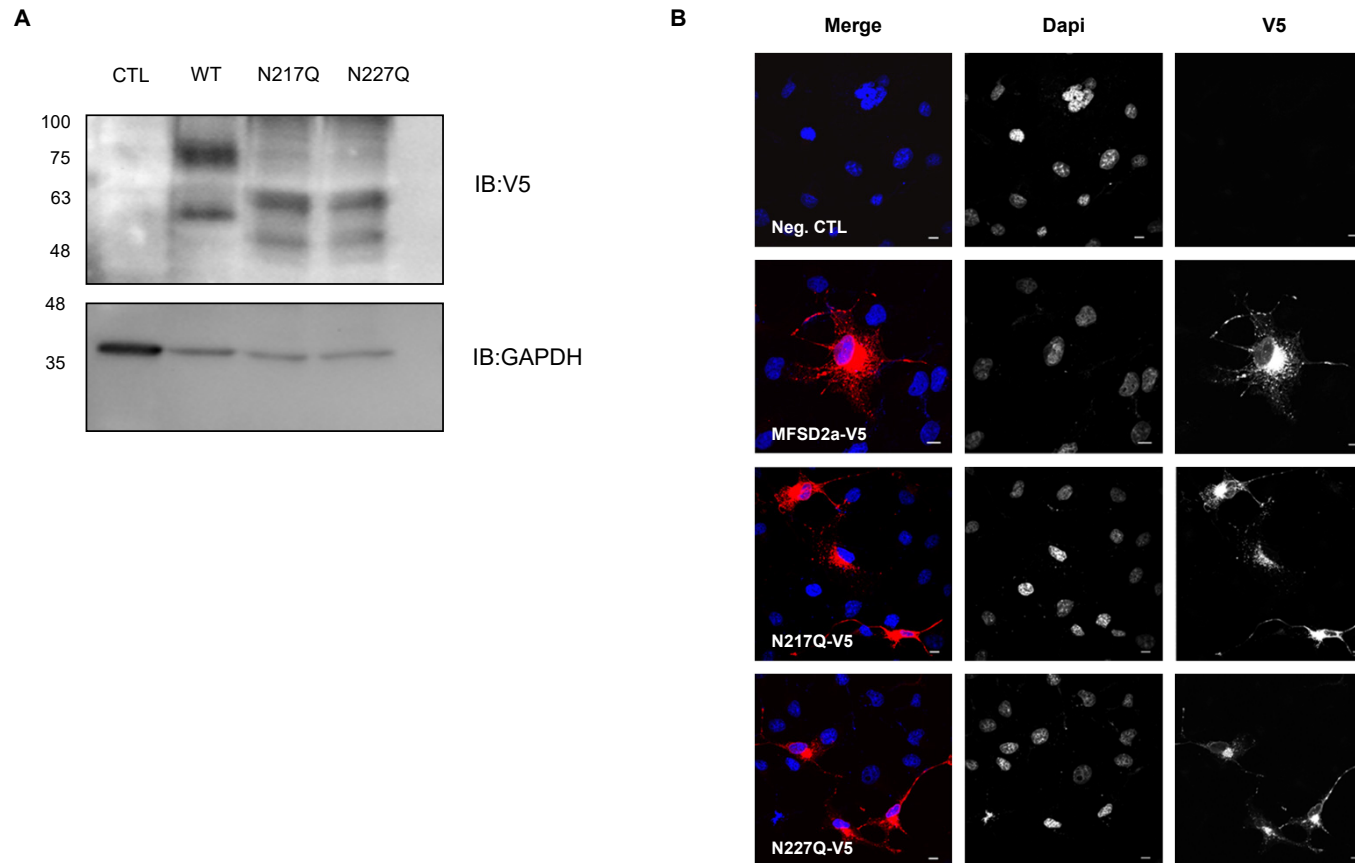

**Supplementary Figure 1:** Expression and localisation of MFSD2a N-glycosylation mutants in HEK293T cells. **A.** HEK293T cells were transfected with pLVX-YFP (CTL), pLVX-MFSD2a-V5 (WT), pLVX-N217Q-V5 or pLVX-N227Q-V5. Cells were lysed 48 h after transfection and protein extracts were analysed by Western blot using an anti-V5 antibody (upper panel). GAPDH detection served as a loading control (lower panel). **B.** Cos-7 cells were transfected with pLVX- (neg. CTL), pLVX-MFSD2aV5, pLVX-N217QV5 or pLVX-N227QV5. Cells were fixed 48 h after transfection and MFSD2a was detected using anti-V5 and Alexa Fluor 568-conjugated anti-mouse IgG antibodies (red) while nuclei were stained with DAPI (blue). Stained cells were analysed by confocal microscopy using a Nikon Eclipse Ti microscope coupled with a Nikon A1R confocal unit and the CFI Plan Apochromat  $\lambda$  60x/1.4 oil objective. Representative images of three independent transfections are shown. Scale bar: 10  $\mu$ m.
