# Supplementary material for: Galectin-1 Modulates the Fusogenic Activity of Placental Endogenous Retroviral Envelopes
Source: Viruses. 2023 Dec 16;15(12):2441. doi: 10.3390/v15122441 (PMC10747188; doi:10.3390/v15122441)
Supplement: Supplementary file 1 [file viruses-15-02441-s001.zip › Supplementary Data 1.xlsx]

## Sheet: Fig 3
Figure 3B		Relative Light Units			Mean	Normalized RLU	Figure 3C		Relative Light Units			Mean	Normalized RLU	Figure 3D	mock-transfected	Relative Light Units			Mean	Normalized RLU
HEK293T	Virus only	6.72	6.96	7.14	6.94	5.56	Cos7	Virus only	13.3	14.7	14.9	14.3	0.521898	HeLa	Virus only	0.68	0.58	0.64	0.633333	2.66667
	Gal-1	22	22.5	22.6	22.3667	22		Gal-1	51.5	57.6	57.7	55.6	2.66029		Gal-1	0.63	0.68	0.56	0.623333	4.30769
	Gal-1 + Lact	8.12	8.59	8.76	8.49	9.29		Gal-1 + Lact	9.25	9.66	9.97	9.62667	0.338967		Gal-1 + Lact	0.6	0.52	0.55	0.556667	3.66667
															WT	Relative Light Units			Mean	Normalized RLU
															Virus only	7.7	9.52	10.8	9.34	10.4944
															Gal-1	69.8	89.5	96.7	85.3333	105.35
	Virus only	38	38.7	38.5	38.4	36.9		Virus only	19	19.8	21	19.9333	0.35		Gal-1 + Lact	3.82	3.7	3.96	3.82667	4.25185
	Gal-1	130	130	132	130.667	241		Gal-1	63	65	62	63.3333	3.6		N217Q	Relative Light Units			Mean	Normalized RLU
	Gal-1 + Lact	34	33	33	33.3333	70.1		Gal-1 + Lact	7.04	5.95	4.1	5.69667	0.24		Virus only	5.72	5.42	5.3	5.48	109.6
															Gal-1	127	125	126	126	1260
															Gal-1 + Lact	13.4	13.4	13.2	13.3333	133.333
	Virus only	4.67	4.98	4.86	4.83667	5.24		Virus only	2.03	2.28	2.46	2.25667	0.71		N227Q	Relative Light Units			Mean	Normalized RLU
	Gal-1	34.1	33	29.9	32.3333	31.2		Gal-1	9.7	9.5	9.1	9.43333	3.91		Virus only	2.43	2.55	2.55	2.51	2.32407
	Gal-1 + Lact	2.27	2.79	2	2.35333	12.1		Gal-1 + Lact	1.3	1.3	1.4	1.33333	1.25		Gal-1	13.5	14	14.1	13.8667	12.6061
															Gal-1 + Lact	0.77	0.87	0.87	0.836667	0.828383
															mock-transfected	Relative Light Units			Mean	Normalized RLU
															Virus only	0.86	0.97	0.97	0.933333	2.02899
															Gal-1	0.56	0.62	0.62	0.6	1.42857
															Gal-1 + Lact	0.58	0.54	0.51	0.543333	1.55238
															WT	Relative Light Units			Mean	Normalized RLU
															Virus only	2.51	3.5	3.75	3.25333	8.34188
															Gal-1	17.4	19.3	22.3	19.6667	53.1532
															Gal-1 + Lact	0.91	1.6	1.38	1.29667	3.0155
															N217Q	Relative Light Units			Mean	Normalized RLU
															Virus only	3.78	4.45	4.7	4.31	4.02804
															Gal-1	14.1	14.4	14.8	14.4333	14.5791
															Gal-1 + Lact	1.56	1.77	1.76	1.69667	1.63141
															N227Q	Relative Light Units			Mean	Normalized RLU
															Virus only	7.57	8.24	9.13	8.31333	14.0904
															Gal-1	71.1	75.4	80.8	75.7667	78.11
															Gal-1 + Lact	10.8	10.3	10.4	10.5	11.7978
															Mock-transfected	Relative Light Units			Mean	Normalized RLU
															PBS	1.17	1.19	0.121	0.827	0.25175
															Gal-1	1.18	1.24	1.2	1.20667	0.265493
															Gal-1 + Lac	1.22	1.16	1.23	1.20333	0.339925
															WT
															PBS	2.26	2.37	2.34	2.32333	0.640037
															Gal-1	28	29	29.3	28.7667	7.03341
															Gal-1 + Lac	5.28	5.4	5.56	5.41333	1.33333
															N217Q
															PBS	4.02	4.09	4.31	4.14	1.1662
															Gal-1	63.7	65.2	66.2	65.0333	20.2596
															Gal-1 + Lac	4.43	4.21	4.46	4.36667	1.96255
															N227Q
															PBS	1.88	1.94	2.02	1.94667	0.73183
															Gal-1	38.6	39.5	40.8	39.6333	14.386
															Gal-1 + Lac	6.88	7.38	7.06	7.10667	2.40496
Figure 4B		Relative Light Units			Mean	Normalized RLU	Figure 4C		Relative Light Units			Mean	Normalized RLU	Figure 4D		Relative Light Units			Mean	Normalized RLU
HUVEC	Virus only	1.1	0.81	0.86	0.923333	4.61667	Jurkat	Virus only	30.6	41	25.2	32.2667	107.556	U87-MG	Virus only	78.7	102.1	105.1	95.3	501.579
	Gal-1	32.1	31.1	28.8	30.6667	153.333		Gal-1	185	180	174	179.667	898.333		Gal-1	505.6	534.4	549	529.667	3310.42
	Gal-1 + Lact	2.5	1.4	1.72	1.87333	9.36667		Gal-1 + Lact	19.1	10	12.5	13.8667	34.6667		Gal-1 + Lact	82.3	91.8	89.4	87.8333	487.963
	Virus only	1	2.05	2.15	1.73333	5.77		Virus only	3.42	3.61	3.28	3.43667	16.3651		Virus only	490	408	348	415.333	3194.87
	Gal-1	55.7	59.5	58.6	57.9333	192		Gal-1	121	121	118	120	218.182		Gal-1	2345	1804	1555	1901.33	13581
	Gal-1 + Lact	1.07	1.52	1.48	1.35667	4.5		Gal-1 + Lact	6.79	6.87	6.84	6.83333	10.199		Gal-1 + Lact	263	202	178	214.333	1530.95
								Virus only	7.3	13.1	12.8	11.0667	85.1282		Virus only	724	810	831	788.333	7883.33
								Gal-1	328	324	280	310.667	1479.37		Gal-1	4971	5260	5557	5262.67	40482.1
								Gal-1 + Lact	1.95	2.12	1.85	1.97333	11.6078		Gal-1 + Lact	358	276	397	343.667	2643.59
Figure 5A		Relative Light Units			Mean	Normalized RLU	Figure 5B		Relative Light Units			Mean	Normalized RLU	Figure 5C		Relative Light Units			Mean	Normalized RLU
HEK293T	Virus only	4948	4867	4905	4906.67	10013.6	HeLa	Virus only	26.8	39.8	33	33.2	110.667	Cos-7	Virus only	142	148	147	145.667	138.73
	Gal-1	4227	4097	4128	4150.67	6694.62		Gal-1	448	372	166	328.667	1643.33		Gal-1	1105	1148	1174	1142.33	1269.26
	Gal-1 + Lact	4329	4385	4569	4427.67	7028.04		Gal-1 + Lact	117	83	41	80.3333	200.833		Gal-1 + Lact	199	210	217	208.667	173.889
		Relative Light Units			Mean	Normalized RLU			Relative Light Units			Mean	Normalized RLU			Relative Light Units			Mean	Normalized RLU
	Virus only	5012	5053	5251	5105.33	15015.7		Virus only	546	544	542	544	2266.67		Virus only	20.9667	28.7667	34.1667	27.9667	25.4242
	Gal-1	4023	3900	3855	3926	7138.18		Gal-1	9790	9925	10056	9923.67	76335.9		Gal-1	281.167	361	281.667	307.944	279.949
	Gal-1 + Lact	4261	3965	4085	4103.67	13678.9		Gal-1 + Lact	1533	1538	1571	1547.33	10315.6		Gal-1 + Lact	59.6667	47.6667	36.6667	48	43.6364
		Relative Light Units			Mean	Normalized RLU
	Virus only	236	380	374	330	702.128		Virus only	3.62	3.78	3.85	3.75	25.6		Virus only	79.1	87.4	85.4	83.9667	3.52
	Gal-1	145	135	101	127	302.381		Gal-1	46.6	47.5	47.9	47.3333	404.5		Gal-1	512	533	500	515	21.5
	Gal-1 + Lact	172	256	254	227.333	528.682		Gal-1 + Lact	3.93	4.01	3.62	3.85333	36.6		Gal-1 + Lact	102	102	105	103	4.22
Figure 5D		Relative Light Units			Mean	Normalized RLU	Figure 5E		Relative Light Units			Mean	Normalized RLU	Figure 5F		Relative Light Units			Mean	Normalized RLU
Jurkat	Virus only	1250	1000	1352	1200.67	2668.15	HUVEC	Virus only	69.6	60.1	48.2	59.3	269.545	U87-MG	Virus only	33066	35658	39289	36004.3	1.20014e+06
	Gal-1	7730	7772	8064	7855.33	21230.6		Gal-1	1448	1299	1081	1276	6715.79		Gal-1	78138	84624	86539	83100.3	2.77001e+06
	Gal-1 + Lact	1318	1305	1331	1318	2995.45		Gal-1 + Lact	144	79.1	74	99.0333	521.228		Gal-1 + Lact	40249	43878	41876	42001	1.40003e+06
		Relative Light Units			Mean	Normalized RLU			Relative Light Units			Mean	Normalized RLU			Relative Light Units			Mean	Normalized RLU
	Virus only	492	521	500	504.333	2017.33		Virus only	126	108	95.1	109.7	731.333		Virus only	6553	7352	7217	7040.67	78229.6
	Gal-1	4505	4661	4474	4546.67	15678.2		Gal-1	1642	1700	1652	1664.67	11097.8		Gal-1	8180	8579	8867	8542	106775
	Gal-1 + Lact	687	705	657	683	2732		Gal-1 + Lact	527	524	516	522.333	1865.48		Gal-1 + Lact	5789	5754	5836	5793	115860
		Relative Light Units			Mean	Normalized RLU			Relative Light Units			Mean	Normalized RLU			Relative Light Units			Mean	Normalized RLU
	Virus only	256	257	249	254	1336.84		Virus only	188	192	194	191.333	2125.93		Virus only	28909	32728	33291	31642.7	632853
	Gal-1	2519	2446	2416	2460.33	10697.1		Gal-1	5051	5095	5119	5088.33	72690.5		Gal-1	32475	36105	37119	35233	704660
	Gal-1 + Lact	229	234	215	226	461.224		Gal-1 + Lact	347	350	352	349.667	8741.67		Gal-1 + Lact	21327	23598	24587	23170.7	463413
